# Supplementary material for: Plant neighbor identity influences plant biochemistry and physiology related to defense
Source: Springer Nature journal article supplement (doi:10.1186/1471-2229-10-115), 2010-06-17

**Additional File 6 - Table S6. Soil physiochemical properties.**

Soil properties in heterospecific (L, low density of *C. maculosa*) and conspecific (H, high density of *C. maculosa*) stands. Standard deviations are noted in parenthesis for each measurement. None of the measurements were significantly different between stand type at p = 0.01.


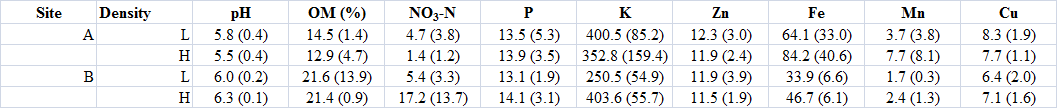

Supplement: Additional file 6 [file 1471-2229-10-115-s6.doc]
